# Supplementary material for: Effects of High Hydrostatic Pressure Combined with Vacuum-Freeze Drying on the Aroma-Active Compounds in Blended Pumpkin, Mango, and Jujube Juice
Source: MDPI journal article supplement (doi:10.3390/foods10123151), 2021-12-20
Supplement: s1 [file s1]

**Table S1.** The result of test of HHP\*VFD between-subjects effects in fresh, HHP3, VFD, and HHP3-VFD samples.

| No. | Compounds                                   | df | F          | Sig      | $\eta^2$ |
|-----|---------------------------------------------|----|------------|----------|----------|
| A1  | Acetone                                     | 1  | 10.57*     | 0.0120   | 0.57     |
| A3  | Ethyl vinyl ketone                          | 1  | 77.87*     | < 0.0001 | 0.91     |
| A4  | 1-(1,3-Dimethyl-3-cyclohexen-1-yl) ethanone | 1  | 1763.70*   | < 0.0001 | 1.00     |
| A5  | Acetoin                                     | 1  | 1560.96*   | < 0.0001 | 1.00     |
| A6  | 6-Methyl-5-hepten-2-one                     | 1  | 1007.45*   | < 0.0001 | 0.99     |
| A7  | 4'-Methyl acetophenone                      | 1  | 18824.00*  | < 0.0001 | 1.00     |
| A8  | $\beta$ -Damascenone                        | 1  | 1154.55*   | < 0.0001 | 0.99     |
| A9  | Geranylacetone                              | 1  | 2.46       | 0.1550   | 0.24     |
| A10 | $\beta$ -Ionone                             | 1  | 7.46*      | 0.0260   | 0.48     |
| B1  | Acetaldehyde                                | 1  | 19.09*     | 0.0020   | 0.71     |
| B2  | 2-Methylbutyraldehyde                       | 1  | 10.44*     | 0.0120   | 0.57     |
| B3  | Isovaleraldehyde                            | 1  | 2.33       | 0.1650   | 0.23     |
| B4  | Valeraldehyde                               | 1  | 5.13       | 0.0530   | 0.39     |
| B5  | Hexanal                                     | 1  | 454.97*    | < 0.0001 | 0.98     |
| B6  | 3-Methyl-2-butenal                          | 1  | 102.88*    | < 0.0001 | 0.93     |
| B7  | Heptaldehyde                                | 1  | 81.89*     | < 0.0001 | 0.91     |
| B8  | (E)-2-Hexenal                               | 1  | 13.08*     | 0.0070   | 0.62     |
| B9  | Furfural                                    | 1  | 52.95*     | < 0.0001 | 0.87     |
| B10 | (E)-2-Heptenal                              | 1  | 32.65*     | < 0.0001 | 0.80     |
| B11 | 1-Nonanal                                   | 1  | 305.85*    | < 0.0001 | 0.98     |
| B12 | 5-Ethyl-1-cyclopentene-1-carboxaldehyde     | 1  | 523.20*    | < 0.0001 | 0.99     |
| B13 | (E)-2-Octenal                               | 1  | 591.35*    | < 0.0001 | 0.99     |
| B14 | (E, E)-2,4-Heptadienal                      | 1  | 0.06       | 0.8210   | 0.01     |
| B15 | Benzaldehyde                                | 1  | 40.92*     | < 0.0001 | 0.84     |
| B16 | (E)-2-Nonenal                               | 1  | 0.46       | 0.5150   | 0.06     |
| B17 | (E, Z)-2,6-Nonadienal                       | 1  | 144.19*    | < 0.0001 | 0.95     |
| B18 | $\beta$ -Cyclocitral                        | 1  | 6.27*      | 0.0370   | 0.44     |
| B19 | 5-Hydroxymethylfurfural                     | 1  | 83780.95*  | < 0.0001 | 1.00     |
| C1  | 3-Carene                                    | 1  | 72.72*     | < 0.0001 | 0.90     |
| C2  | $\alpha$ -Phellandrene                      | 1  | 819.40*    | < 0.0001 | 0.99     |
| C3  | Myrcene                                     | 1  | 8.46*      | 0.0200   | 0.51     |
| C4  | $\beta$ -Thujene                            | 1  | 73.54*     | < 0.0001 | 0.90     |
| C5  | 4-Carene                                    | 1  | 0.81       | 0.3940   | 0.09     |
| C6  | DL-Limonene                                 | 1  | 49.43*     | < 0.0001 | 0.86     |
| C7  | Terpinolene                                 | 1  | 1484.3*    | < 0.0001 | 1.00     |
| C8  | $\alpha$ , p-Dimethylstyrene                | 1  | 0.55       | 0.4790   | 0.06     |
| D1  | 1-Penten-3-ol                               | 1  | 162867.00* | < 0.0001 | 1.00     |
| D2  | 2-Methyl-1-butanol                          | 1  | 21312.00*  | < 0.0001 | 1.00     |
| D3  | 1-Pentanol                                  | 1  | 1.75       | 0.2230   | 0.18     |

|     |                                     |   |         |          |      |
|-----|-------------------------------------|---|---------|----------|------|
| D4  | (E)-3-Hexen-1-ol                    | 1 | 1.76    | 0.2210   | 0.18 |
| D5  | 1-Octen-3-ol                        | 1 | 102.43* | < 0.0001 | 0.93 |
| D6  | p-Cymen-8-ol                        | 1 | 0.10    | 0.7580   | 0.01 |
| D7  | Benzyl alcohol                      | 1 | 6.90*   | 0.0300   | 0.46 |
| D8  | Carveol                             | 1 | 40.19*  | < 0.0001 | 0.83 |
| E1  | Acetic acid                         | 1 | 39.62*  | < 0.0001 | 0.83 |
| E2  | Propionic acid                      | 1 | 76.13*  | < 0.0001 | 0.91 |
| E3  | Butanoic Acid                       | 1 | 57.62*  | < 0.0001 | 0.88 |
| E4  | 2-Methyl butanoic acid              | 1 | 26.78*  | 0.0010   | 0.77 |
| E5  | Valeric acid                        | 1 | 66.77*  | < 0.0001 | 0.89 |
| E6  | Hexanoic acid                       | 1 | 41.14*  | < 0.0001 | 0.84 |
| E7  | Heptanoic acid                      | 1 | 67.60*  | < 0.0001 | 0.89 |
| E8  | Octanoic acid                       | 1 | 34.65*  | < 0.0001 | 0.81 |
| E9  | Benzoic acid                        | 1 | 28.20*  | 0.0010   | 0.78 |
| F1  | Methyl acetate                      | 1 | 5.57*   | 0.0460   | 0.41 |
| F2  | Ethyl acetate                       | 1 | 18.50*  | 0.0030   | 0.70 |
| F3  | Methyl butyrate                     | 1 | 316.57* | < 0.0001 | 0.98 |
| F4  | Ethyl butyrate                      | 1 | 10.89*  | 0.0110   | 0.58 |
| F5  | Methyl valerate                     | 1 | 21.72*  | 0.0020   | 0.73 |
| F6  | Isoamyl acetate                     | 1 | 239.07* | < 0.0001 | 0.97 |
| F7  | Methyl hexanoate                    | 1 | 11.27*  | 0.0100   | 0.59 |
| F8  | Methyl heptanoate                   | 1 | 297.07* | < 0.0001 | 0.97 |
| F9  | Methyl benzoate                     | 1 | 6.30*   | 0.0360   | 0.44 |
| F10 | 3-Phenylpropionic acid methyl ester | 1 | 166.71* | < 0.0001 | 0.95 |

\* means significance at  $p < 0.05$  level.

**Table S2.** Identification of aroma-active compounds in blended juice blended juices treated by HHP and VFD by DF and OAV analyses.

[illegible]

|    |                        |                 |   |   |   |   |   |   |         |       |       |       |       |       |       |
|----|------------------------|-----------------|---|---|---|---|---|---|---------|-------|-------|-------|-------|-------|-------|
| D4 | (E)-3-Hexen-1-ol       | green, earthy   | 6 | - | 8 | 7 | 8 | - | -       | -     | -     | -     | -     | -     | -     |
| D5 | 1-Octen-3-ol           | earthy, oily    | 8 | 8 | 8 | 8 | 8 | 8 | 1[3]    | 5.15  | 7.43  | 8.33  | 10.89 | 17.07 | 10.43 |
| E2 | Propionic acid         | pungent         | 8 | 8 | 8 | 8 | - | - | -       | -     | -     | -     | -     | -     | -     |
| E3 | Butanoic acid          | sharp, cheese   | 6 | - | 8 | - | - | - | -       | -     | -     | -     | -     | -     | -     |
| E4 | 2-Methyl butanoic acid | pungent, cheese | 8 | 8 | 8 | 8 | - | - | -       | -     | -     | -     | -     | -     | -     |
| E5 | Valeric acid           | sweaty, rancid  | - | 6 | - | - | - | - | -       | -     | -     | -     | -     | -     | -     |
| E6 | Hexanoic acid          | sour, sweaty    | 8 | 7 | 8 | 8 | 8 | 6 | -       | -     | -     | -     | -     | -     | -     |
| E7 | Heptanoic acid         | fruity, sweat   | 6 | - | - | - | - | - | -       | -     | -     | -     | -     | -     | -     |
| E8 | Octanoic acid          | waxy, vegetable | - | 6 | 7 | - | 8 | - | -       | -     | -     | -     | -     | -     | -     |
| F1 | Methyl acetate         | -               | - | - | - | - | - | - | 2[5]    | 2.42  | -     | -     | -     | -     | -     |
| F2 | Ethyl acetate          | -               | - | - | - | - | - | - | 8.5[6]  | 4.73  | 1.25  | -     | -     | -     | 1.22  |
| F3 | Methyl butyrate        | fruity, sweet   | - | - | - | 6 | - | - | 15.1[6] | 4.78  | 1.29  | -     | -     | -     | -     |
| F4 | Ethyl butyrate         | -               | - | - | - | - | - | - | 1.1[6]  | 88.79 | 13.00 | 4.99  | 3.58  | -     | -     |
| F6 | Isoamyl acetate        | -               | - | - | - | - | - | - | 2[2]    | 2.36  | -     | -     | -     | -     | -     |
| F9 | Methyl benzoate        | -               | - | - | - | - | - | - | 0.52[2] | 18.79 | 10.37 | 14.83 | 11.50 | 12.05 | 10.09 |

<sup>a</sup> Number assignment referred to Table 2.

<sup>b</sup> Odor description as perceived at the sniffing port; ‘-’ means not detected by assessors.

<sup>c</sup> DF, total times detected by 4 assessors at 8 trials; ‘-’ means the volatiles were detected by assessors less than 6 times..

<sup>d</sup> Odor thresholds in water taken from the references; ‘-’ indicates the volatile concentrations are lower than their threshold value.

<sup>e</sup> OAV values are given as means (n = 3); ‘-’ indicates OAV is lower than 1.

References:

1. Ahmed, E.M.; Dennison, R.A.; Dougherty, R.H.; Shaw, P.E. Flavor and odor thresholds in water of selected orange juice components. *J. Agric. Food Chem.* 1978, 26, 187-191, doi:10.1021/jf60215a074.
2. Pino, J.A.; Mesa, J. Contribution of volatile compounds to mango (*Mangifera indica* L.) aroma. *Flavour Fragr. J.* 2006, 21, 207-213, doi:10.1002/ffj.1703.
3. Buttery, R.G.; Ling, L.C. Additional studies on flavor components of corn tortilla chips. *J. Agric. Food Chem.* 1998, 46, 2764-2769, doi:10.1021/jf980125b.
4. Buttery, R. Quantitative and sensory aspects of flavor of tomato and other vegetables and fruits. *Flavor science: Sensible principles and techniques.* 1993, 259-286.
5. Balavoine, P. Observations Sur Les qualités Olfactives Et Gustatives Des Aliments. *Mitteilungen aus dem Gebiete der Lebens-mittel-untersuchung un Hygiene Travaux de chimie alimentaire et d'hygiene* 1948, 39, 342-350.
6. Pino, J.; Torricella, R.; Orsi, F. Correlation between sensory and gas-chromatographic measurements on grapefruit juice volatiles. *Nahrung-Food* 1986, 30, 783-790.
